# Supplementary material
Source: PubMed Central journal article supplement (PMC117364)
Supplement: pnas_022628299_2.pdf [file pnas_022628299_2.pdf]

**Table 1. Decomposition of the core deterministic model of Fig. 1 into detailed reaction steps**

| Reaction number | Reaction step                                       | Probability of reaction                           |
|-----------------|-----------------------------------------------------|---------------------------------------------------|
| 1               | $G + P_N \xrightarrow{a_1} GP_N$                    | $w_1 = a_1 \times G \times P_N / \Omega$          |
| 2               | $GP_N \xrightarrow{d_1} G + P_N$                    | $w_2 = d_1 \times GP_N$                           |
| 3               | $GP_N + P_N \xrightarrow{a_2} GP_{N2}$              | $w_3 = a_2 \times GP_N \times P_N / \Omega$       |
| 4               | $GP_{N2} \xrightarrow{d_2} GP_N + P_N$              | $w_4 = d_2 \times GP_{N2}$                        |
| 5               | $GP_{N2} + P_N \xrightarrow{a_3} GP_{N3}$           | $w_5 = a_3 \times GP_{N2} \times P_N / \Omega$    |
| 6               | $GP_{N3} \xrightarrow{d_3} GP_{N2} + P_N$           | $w_6 = d_3 \times GP_{N3}$                        |
| 7               | $GP_{N3} + P_N \xrightarrow{a_4} GP_{N4}$           | $w_7 = a_4 \times GP_{N3} \times P_N / \Omega$    |
| 8               | $GP_{N4} \xrightarrow{d_4} GP_{N3} + P_N$           | $w_8 = d_4 \times GP_{N4}$                        |
| 9               | $[G, GP_N, GP_{N2}, GP_{N3}] \xrightarrow{v_s} M_P$ | $w_9 = v_s \times (G + GP_N + GP_{N2} + GP_{N3})$ |
| 10              | $M_P + E_m \xrightarrow{k_{m1}} C_m$                | $w_{10} = k_{m1} \times M_P \times E_m / \Omega$  |
| 11              | $C_m \xrightarrow{k_{m2}} M_P + E_m$                | $w_{11} = k_{m2} \times C_m$                      |
| 12              | $C_m \xrightarrow{k_{m3}} E_m$                      | $w_{12} = k_{m3} \times C_m$                      |
| 13              | $M_P \xrightarrow{k_s} M_P + P_0$                   | $w_{13} = k_s \times M_P$                         |
| 14              | $P_0 + E_1 \xrightarrow{k_{11}} C_1$                | $w_{14} = k_{11} \times P_0 \times E_1 / \Omega$  |
| 15              | $C_1 \xrightarrow{k_{12}} P_0 + E_1$                | $w_{15} = k_{12} \times C_1$                      |
| 16              | $C_1 \xrightarrow{k_{13}} P_1 + E_1$                | $w_{16} = k_{13} \times C_1$                      |
| 17              | $P_1 + E_2 \xrightarrow{k_{21}} C_2$                | $w_{17} = k_{21} \times P_1 \times E_2 / \Omega$  |
| 18              | $C_2 \xrightarrow{k_{22}} P_1 + E_2$                | $w_{18} = k_{22} \times C_2$                      |
| 19              | $C_2 \xrightarrow{k_{23}} P_0 + E_2$                | $w_{19} = k_{23} \times C_2$                      |
| 20              | $P_1 + E_3 \xrightarrow{k_{31}} C_3$                | $w_{20} = k_{31} \times P_1 \times E_3 / \Omega$  |
| 21              | $C_3 \xrightarrow{k_{32}} P_1 + E_3$                | $w_{21} = k_{32} \times C_3$                      |
| 22              | $C_3 \xrightarrow{k_{33}} P_2 + E_3$                | $w_{22} = k_{33} \times C_3$                      |
| 23              | $P_2 + E_4 \xrightarrow{k_{41}} C_4$                | $w_{23} = k_{41} \times P_2 \times E_4 / \Omega$  |
| 24              | $C_4 \xrightarrow{k_{42}} P_2 + E_4$                | $w_{24} = k_{42} \times C_4$                      |
| 25              | $C_4 \xrightarrow{k_{43}} P_1 + E_4$                | $w_{25} = k_{43} \times C_4$                      |
| 26              | $P_2 + E_d \xrightarrow{k_{d1}} C_d$                | $w_{26} = k_{d1} \times P_2 \times E_d / \Omega$  |
| 27              | $C_d \xrightarrow{k_{d2}} P_2 + E_d$                | $w_{27} = k_{d2} \times C_d$                      |
| 28              | $C_d \xrightarrow{k_{d3}} E_d$                      | $w_{28} = k_{d3} \times C_d$                      |
| 29              | $P_2 \xrightarrow{k_1} P_N$                         | $w_{29} = k_1 \times P_2$                         |
| 30              | $P_N \xrightarrow{k_2} P_2$                         | $w_{30} = k_2 \times P_N$                         |

Steps 1-8 have been developed for the case  $n = 4$ . Only six, four, and two steps must be considered if the maximum number of  $P_N$  molecules binding to the gene promoter is equal to 3, 2 or 1.
