# Supplementary material
Source: PubMed Central journal article supplement (PMC117364)
Supplement: pnas_022628299_3.pdf [file pnas_022628299_3.pdf]

**Table 2. Parameter values used for stochastic simulations of the detailed molecular model for circadian oscillations**

| Reaction steps | Parameter values                                                                                                                                                                                                                                                                                                                                                                                                                                                                                                                                                                                                                                                                                                                                                                                                                                                                                                                                                                                                                                                                                                                  |
|----------------|-----------------------------------------------------------------------------------------------------------------------------------------------------------------------------------------------------------------------------------------------------------------------------------------------------------------------------------------------------------------------------------------------------------------------------------------------------------------------------------------------------------------------------------------------------------------------------------------------------------------------------------------------------------------------------------------------------------------------------------------------------------------------------------------------------------------------------------------------------------------------------------------------------------------------------------------------------------------------------------------------------------------------------------------------------------------------------------------------------------------------------------|
| Steps 1–8      | <p>For <math>n = 4</math>:</p> $a_1 = \Omega \text{ mol}^{-1} \text{ h}^{-1}, d_1 = (160 \times \Omega) \text{ h}^{-1},$ $a_2 = (10 \times \Omega) \text{ mol}^{-1} \text{ h}^{-1}, d_2 = (100 \times \Omega) \text{ h}^{-1},$ $a_3 = (100 \times \Omega) \text{ mol}^{-1} \text{ h}^{-1}, d_3 = (10 \times \Omega) \text{ h}^{-1},$ $a_4 = (100 \times \Omega) \text{ mol}^{-1} \text{ h}^{-1}, d_4 = (10 \times \Omega) \text{ h}^{-1}$ <p>For <math>n = 3</math>:</p> $a_1 = \Omega \text{ mol}^{-1} \text{ h}^{-1}, d_1 = (80 \times \Omega) \text{ h}^{-1},$ $a_2 = (100 \times \Omega) \text{ mol}^{-1} \text{ h}^{-1}, d_2 = (100 \times \Omega) \text{ h}^{-1},$ $a_3 = (100 \times \Omega) \text{ mol}^{-1} \text{ h}^{-1}, d_3 = \Omega \text{ h}^{-1}$ <p>For <math>n = 2</math>:</p> $a_1 = \Omega \text{ mol}^{-1} \text{ h}^{-1}, d_1 = (40 \times \Omega) \text{ h}^{-1},$ $a_2 = (100 \times \Omega) \text{ mol}^{-1} \text{ h}^{-1}, d_2 = (10 \times \Omega) \text{ h}^{-1}$ <p>For <math>n = 1</math>:</p> $a_1 = (10 \times \Omega) \text{ mol}^{-1} \text{ h}^{-1}, d_1 = (20 \times \Omega) \text{ h}^{-1}$ |
| Step 9         | $v_s = (0.5 \times \Omega) \text{ mol h}^{-1}$                                                                                                                                                                                                                                                                                                                                                                                                                                                                                                                                                                                                                                                                                                                                                                                                                                                                                                                                                                                                                                                                                    |
| Steps 10–12    | $k_{m1} = 165 \text{ mol}^{-1} \text{ h}^{-1}, k_{m2} = 30 \text{ h}^{-1}, k_{m3} = 3 \text{ h}^{-1},$<br>$E_{m \text{ tot}} = E_m + C_m = (0.1 \times \Omega) \text{ mol}$                                                                                                                                                                                                                                                                                                                                                                                                                                                                                                                                                                                                                                                                                                                                                                                                                                                                                                                                                       |
| Steps 13       | $k_s = 2.0 \text{ h}^{-1}$                                                                                                                                                                                                                                                                                                                                                                                                                                                                                                                                                                                                                                                                                                                                                                                                                                                                                                                                                                                                                                                                                                        |
| Steps 14–16    | $k_{11} = 146.6 \text{ mol}^{-1} \text{ h}^{-1}, k_{12} = 200 \text{ h}^{-1}, k_{13} = 20 \text{ h}^{-1}$<br>$E_{1 \text{ tot}} = E_1 + C_1 = (0.3 \times \Omega) \text{ mol}$                                                                                                                                                                                                                                                                                                                                                                                                                                                                                                                                                                                                                                                                                                                                                                                                                                                                                                                                                    |
| Steps 17–19    | $k_{21} = 82.5 \text{ mol}^{-1} \text{ h}^{-1}, k_{22} = 150 \text{ h}^{-1}, k_{23} = 15 \text{ h}^{-1},$<br>$E_{2 \text{ tot}} = E_2 + C_2 = (0.2 \times \Omega) \text{ mol}$                                                                                                                                                                                                                                                                                                                                                                                                                                                                                                                                                                                                                                                                                                                                                                                                                                                                                                                                                    |
| Steps 20–22    | $k_{31} = 146.6 \text{ mol}^{-1} \text{ h}^{-1}, k_{32} = 200 \text{ h}^{-1}, k_{33} = 20 \text{ h}^{-1},$<br>$E_{3 \text{ tot}} = E_3 + C_3 = (0.3 \times \Omega) \text{ mol}$                                                                                                                                                                                                                                                                                                                                                                                                                                                                                                                                                                                                                                                                                                                                                                                                                                                                                                                                                   |
| Steps 23–25    | $k_{41} = 82.5 \text{ mol}^{-1} \text{ h}^{-1}, k_{42} = 150 \text{ h}^{-1}, k_{43} = 15 \text{ h}^{-1},$<br>$E_{4 \text{ tot}} = E_4 + C_4 = (0.2 \times \Omega) \text{ mol}$                                                                                                                                                                                                                                                                                                                                                                                                                                                                                                                                                                                                                                                                                                                                                                                                                                                                                                                                                    |
| Steps 26–28    | $k_{d1} = 1650 \text{ mol}^{-1} \text{ h}^{-1}, k_{d2} = 150 \text{ h}^{-1}, k_{d3} = 15 \text{ h}^{-1},$<br>$E_{d \text{ tot}} = E_d + C_d = (0.1 \times \Omega) \text{ mol}$                                                                                                                                                                                                                                                                                                                                                                                                                                                                                                                                                                                                                                                                                                                                                                                                                                                                                                                                                    |
| Steps 29–30    | $k_1 = 2.0 \text{ h}^{-1}, k_2 = 1.0 \text{ h}^{-1}$                                                                                                                                                                                                                                                                                                                                                                                                                                                                                                                                                                                                                                                                                                                                                                                                                                                                                                                                                                                                                                                                              |

mol, molecules. Numbered steps refer to those listed in Table 1.
