# Supplementary material
Source: PubMed Central journal article supplement (PMC117364)

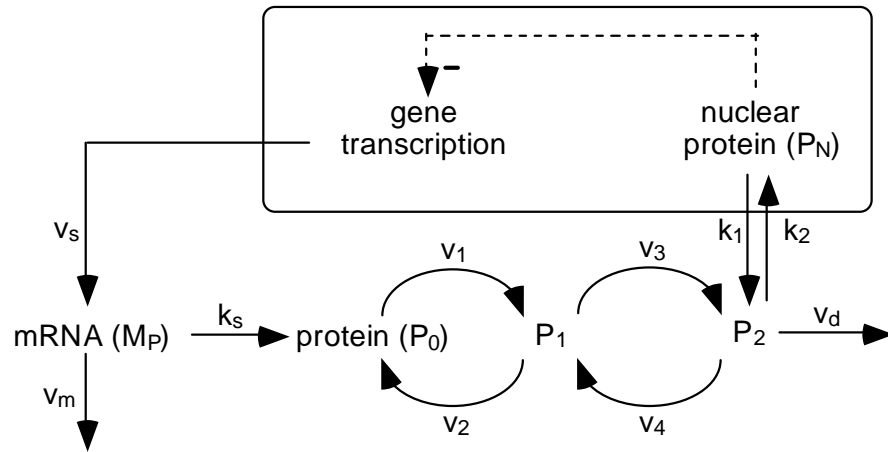

Supplement: pnas_022628299_5.pdf [file pnas_022628299_5.pdf]
